# Supplementary material
Source: ML conference proceedings conference paper supplement (https://proceedings.mlr.press/v193/gadd22a.html)
Supplement: Supplementary file 1 [file gadd22a-supp.pdf]

# Supplementary material for mmVAE: multimorbidity clustering using Relaxed Bernoulli $\beta$ -Variational Autoencoders

**Charles Gadd\***  
*University of Oxford*

CWLGADD@GMAIL.COM

**Krishnarajah Nirantharakumar**  
*University of Birmingham*

K.NIRANTHARAN@BHAM.AC.UK

**Christopher Yau**  
*University of Oxford, Alan Turing Institute, Health Data Research UK*

CHRISTOPHER.YAU@WRH.OX.AC.UK

---

\* Corresponding author

| Primary condition |                    | Prevalence<br>(of $N = 290812$ ) | Total co-morbidities |       |       |
|-------------------|--------------------|----------------------------------|----------------------|-------|-------|
|                   |                    |                                  | 1                    | 2     | 3+    |
| Mental health     | Depression         | 133060 (45.78%)                  | 41929                | 37533 | 53628 |
|                   | Anxiety            | 97239 (33.45%)                   | 27634                | 27040 | 42581 |
|                   | OthMental          | 47124 (16.2%)                    | 11746                | 12153 | 23225 |
|                   | eatingdisorderuom  | 11645 (4.0%)                     | 2795                 | 2816  | 6034  |
|                   | substance misuse   | 11638 (4.0%)                     | 2085                 | 2559  | 6994  |
|                   | SMHmm              | 11108 (3.8%)                     | 1294                 | 2002  | 7812  |
|                   | alcoholproblem     | 5683 (2.0%)                      | 9283626              | 1129  | 3626  |
| Cardiovascular    | hypertension       | 6876 (2.4%)                      | 2113                 | 1763  | 3000  |
|                   | CongHeart          | 2770 (1.0%)                      | 994                  | 715   | 1061  |
|                   | Valve              | 1115 (0.4%)                      | 346                  | 291   | 478   |
|                   | stroke             | 1010 (0.3%)                      | 266                  | 263   | 481   |
|                   | IHD MI             | 664 (0.2%)                       | 156                  | 144   | 364   |
|                   | AF                 | 219 (0.1%)                       | 40                   | 58    | 121   |
|                   | Cardiomyopathy     | 207 (0.1%)                       | 52                   | 53    | 102   |
| Dermatology       | OthSkin            | 28085 (9.7%)                     | 9231                 | 7362  | 11492 |
|                   | psoriasis mm       | 18620 (6.4%)                     | 6428                 | 4985  | 7207  |
|                   | Atopic eczema      | 16581 (5.1%)                     | 4430                 | 4264  | 7887  |
| Gynaecology       | Female infertility | 24121 (8.3%)                     | 8893                 | 6465  | 8767  |
|                   | pcoskoo            | 21012 (7.2%)                     | 6946                 | 5639  | 8427  |
|                   | endometriosis      | 10507 (3.6%)                     | 3151                 | 2729  | 4627  |
|                   | leiomyoma          | 3338 (1.1%)                      | 1205                 | 846   | 1287  |
| Haematology       | VTEall             | 3851 (1.3%)                      | 1112                 | 902   | 1837  |
|                   | perniciousanaemia  | 858 (0.3%)                       | 231                  | 237   | 390   |
|                   | sickle cell        | 119 (0.3%)                       | 46                   | 37    | 36    |
|                   | haemophilia        | 63 (0%)                          | 22                   | 16    | 25    |
| Rheumatology      | InflamArth         | 6609 (2.3%)                      | 2145                 | 1670  | 2794  |
|                   | Ehler              | 1691 (0.6%)                      | 440                  | 416   | 835   |
|                   | SpondArth          | 984 (0.3%)                       | 232                  | 240   | 512   |
| Orthopaedic       | chronicbackpain    | 3107 (1.1%)                      | 735                  | 756   | 1616  |
|                   | scoliosis          | 3238 (1.1%)                      | 1148                 | 863   | 1227  |
|                   | osteoporosis       | 571 (0.2%)                       | 141                  | 100   | 330   |
|                   | Vertebrae          | 5885 (2.0%)                      | 1672                 | 1432  | 2781  |
| Neurology         | Migraine           | 64686 (22.2%)                    | 21332                | 17406 | 25948 |
|                   | OthHeadache        | 23626 (8.1%)                     | 6333                 | 6022  | 11271 |
|                   | epilepsy mm        | 7238 (2.5%)                      | 2346                 | 1872  | 3020  |
|                   | MS                 | 900 (0.3%)                       | 300                  | 237   | 363   |
|                   | spina bifida       | 644 (0.2%)                       | 197                  | 170   | 277   |
|                   | iih                | 577 (0.2%)                       | 144                  | 140   | 293   |
|                   | periph neuro       | 2776 (1.0%)                      | 728                  | 672   | 1376  |



| Primary condition |                              | Prevalence<br>(of $N = 290812$ ) | Total co-morbidities |       |       |
|-------------------|------------------------------|----------------------------------|----------------------|-------|-------|
|                   |                              |                                  | 1                    | 2     | 3+    |
| Respiratory       | Asthma                       | 85315 (29.3%)                    | 30375                | 22920 | 32100 |
|                   | PulmHtn                      | 45 (0%)                          | 11                   | 9     | 25    |
|                   | interstitiallungdiseasemm    | 50 (0%)                          | 11                   | 13    | 26    |
|                   | bronchiectasisdraftv1        | 382 (0.1%)                       | 75                   | 93    | 214   |
|                   | cf                           | 239 (0.1%)                       | 79                   | 78    | 82    |
|                   | osafinal                     | 854 (0.3%)                       | 250                  | 177   | 427   |
|                   | sarcoid                      | 292 (0.1%)                       | 92                   | 78    | 122   |
|                   | copd                         | 323 (0.1%)                       | 44                   | 53    | 226   |
| Other             | Allergic Rhinoconjunctivitis | 92340 (31.8%)                    | 34050                | 24925 | 33429 |
|                   | ibs mm                       | 49439 (17.0%)                    | 14435                | 13054 | 21950 |
|                   | Thyroid                      | 15824 (5.4%)                     | 5327                 | 4101  | 6396  |
|                   | AutoSkin                     | 4108 (1.4%)                      | 1357                 | 1121  | 1630  |
|                   | InflamBowel                  | 3348 (1.2%)                      | 1157                 | 918   | 1273  |
|                   | InflamEye                    | 3270 (1.1%)                      | 1104                 | 852   | 1314  |
|                   | cholelithiasis               | 8682 (3.0%)                      | 2579                 | 2125  | 3978  |
|                   | prithrombocytopenia imrd     | 578 (0.2%)                       | 212                  | 161   | 205   |
|                   | Cancer                       | 2890 (1.0%)                      | 957                  | 791   | 1142  |
|                   | cataract                     | 861 (0.3%)                       | 269                  | 214   | 378   |
|                   | deaf                         | 889 (0.3%)                       | 278                  | 243   | 368   |
|                   | CKDall                       | 604 (0.2%)                       | 95                   | 155   | 354   |
|                   | ChrLiverAll                  | 2446 (0.8%)                      | 696                  | 531   | 1219  |
|                   | ulcer peptic                 | 1562 (0.5%)                      | 430                  | 372   | 760   |
|                   | slesystemic2019              | 612 (0.2%)                       | 154                  | 143   | 315   |
|                   | oa                           | 2204 (0.8%)                      | 568                  | 509   | 1127  |
|                   | AdrenalAll                   | 62 (0%)                          | 19                   | 9     | 34    |
|                   | Pituitary                    | 2010 (0.7%)                      | 678                  | 481   | 851   |
|                   | retinal detach               | 473 (0.2%)                       | 157                  | 119   | 197   |
|                   | pth                          | 134 (0%)                         | 37                   | 30    | 67    |
|                   | hfincidenceprevkoo           | 383 (0.1%)                       | 81                   | 91    | 211   |
|                   | blindmm                      | 118 (0%)                         | 27                   | 22    | 69    |
|                   | solidorgantransplant         | 181 (0.1%)                       | 26                   | 38    | 117   |
|                   | NeuroDev                     | 2542 (0.9%)                      | 724                  | 632   | 1186  |
|                   | turnerssyndrome imrd         | 57 (0%)                          | 24                   | 7     | 26    |
|                   | marfansyndrome imrd          | 125 (0%)                         | 32                   | 35    | 58    |
|                   | HIVall                       | 267 (0.1%)                       | 133                  | 63    | 71    |
|                   | DiabAll                      | 5071 (1.7%)                      | 1350                 | 1243  | 2478  |
|                   | DiabRetino                   | 1720 (0.6%)                      | 328                  | 412   | 980   |
|                   | coeliac                      | 1529 (0.5%)                      | 477                  | 406   | 646   |
|                   | urolithiasis                 | 1973 (0.7%)                      | 598                  | 480   | 895   |
|                   | Somatoform                   | 5060 (1.7%)                      | 269                  | 214   | 378   |

Table 1: The total number of patients with each of the 79 health conditions in the full dataset (after removing non-multimorbidity previous pregnancy cases), and the total number of patients with different numbers of co-morbidities.

| Conditions | Condition combination                            | Prevalence    |
|------------|--------------------------------------------------|---------------|
| 2+         | Depression, Anxiety                              | 13329 (4.59%) |
|            | Asthma, AllergicRhinoConj                        | 9967 (3.43%)  |
|            | Depression, other mental health                  | 4162 (1.43%)  |
|            | Asthma, Depression                               | 3799 (1.3%)   |
|            | AllergicRhinoConj, Depression                    | 3703 (1.3%)   |
|            | AllergicRhinoConj, Migraine                      | 3432 (1.1%)   |
|            | Migraine, Depression                             | 3163 (1.1%)   |
|            | Asthma, Migraine                                 | 2717 (0.9%)   |
|            | Anxiety, Depression, other mental health         | 2715 (0.9%)   |
|            | AllergicRhinConj, Anxiety                        | 2253 (0.8%)   |
|            | AllergicRhinConj, Anxiety, Depression            | 2195 (0.8%)   |
| 3+         | Anxiety, Depression, other mental health         | 2715 (0.9%)   |
|            | AllergicRhinConj, Anxiety, Depression            | 2195 (0.8%)   |
|            | Depression, Anxiety, Asthma                      | 2113 (0.73%)  |
|            | Asthma, Anxiety, Depression                      | 2113 (0.7%)   |
|            | Migraine, Anxiety, Depression                    | 1863 (0.6%)   |
|            | Anxiety', Depression, ibs                        | 1609 (0.6%)   |
| 4+         | Asthma, AllergicRhinConj, Anxiety, Depression    | 931 (0.32%)   |
|            | Asthma, Anxiety, Depression, other mental health | 510 (0.18%)   |
|            | AllergicRhinConj, Migraine, Anxiety, Depression  | 451 (0.16%)   |
|            | AllergicRhinConj, Anxiety, Depression, ibs       | 422 (0.2%)    |
|            | Asthma, Migraine, Anxiety, Depression            | 411 (0.1%)    |

Table 2: The top unique combinations of health conditions, and their respective prevalence for different levels of multimorbidity.

## 1. Experiments

In this section we show additional results which were excluded from the main text due to space constraints. We present the results for multiple choices of  $\beta$  on the reduced (i) asthma (ii) female infertility and (iii) cancer sub-group. In Fig. 1 we plot the factor odds ratios. In Fig. 2-3 we plot the prevalence plots for each of these factor. In Fig. 4-5 we plot the cluster odds ratios. In Fig. 6-7 we plot the prevalence plots for each of these clusters. In Fig. 8 we plot the cluster-factor association matrices. We observe a sharp decrease in factor-cluster sparsity as  $\beta$  increases.

In Fig. 9 we plot the *out-of-distribution* prevalence histograms. We observe that as  $\beta$  increases, and particularly as it shifts into a positive regime, the number of clusters out-of-distribution samples get mapped to overfits.

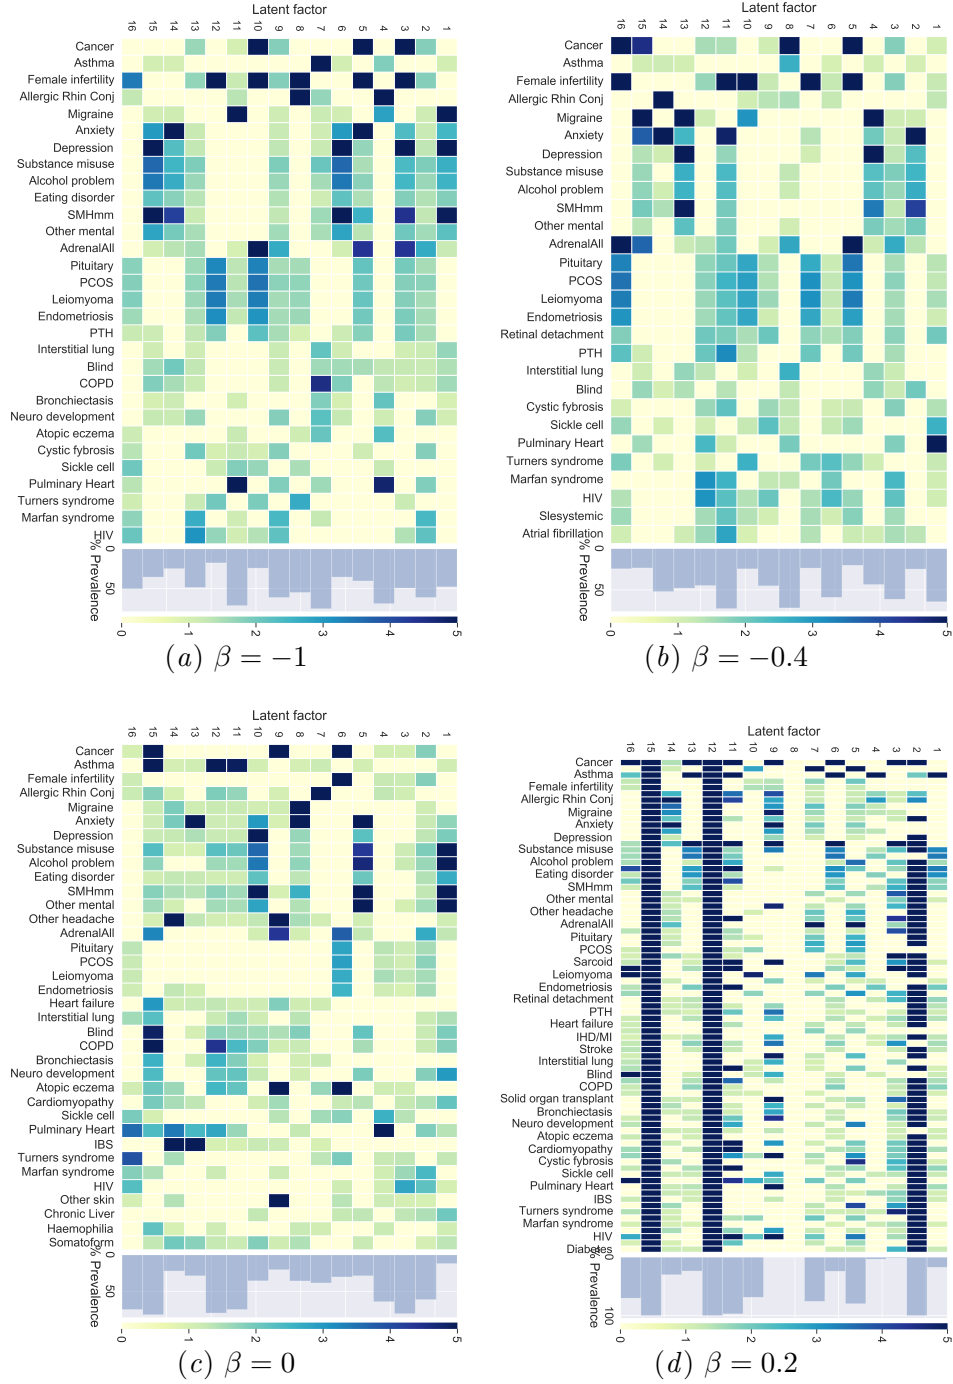

Figure 1: Factor odds ratio on a cohort with (i) asthma (ii) cancer and (iii) female infertility, and the percentage of individuals with each factor. Conditions with no odds ratio above 2 are filtered and odds ratios are truncated.

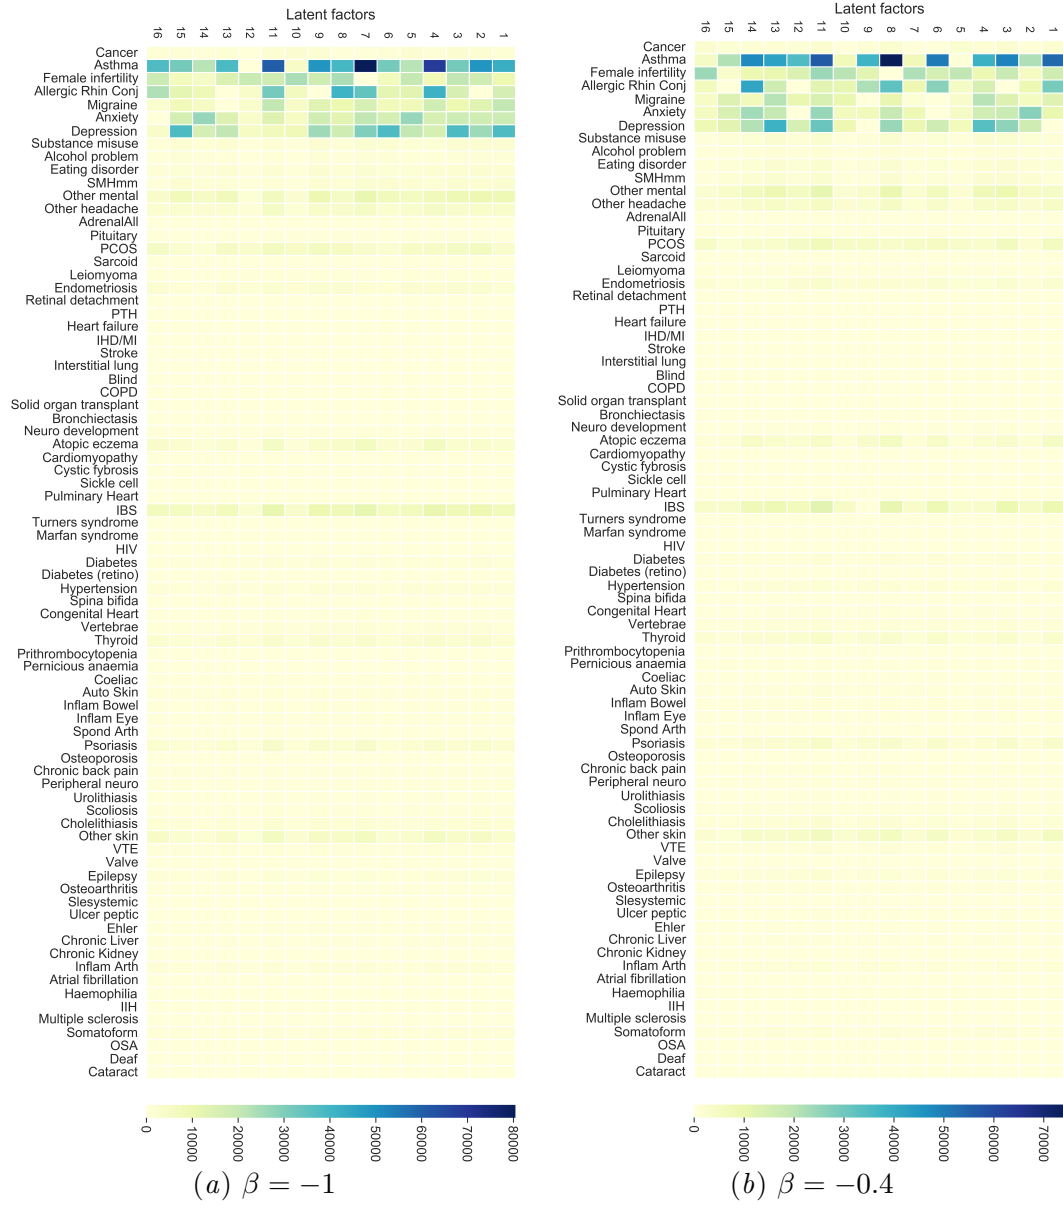

Figure 2: Factor prevalence on a cohort with (i) asthma, (ii) cancer, or (iii) female infertility health conditions.

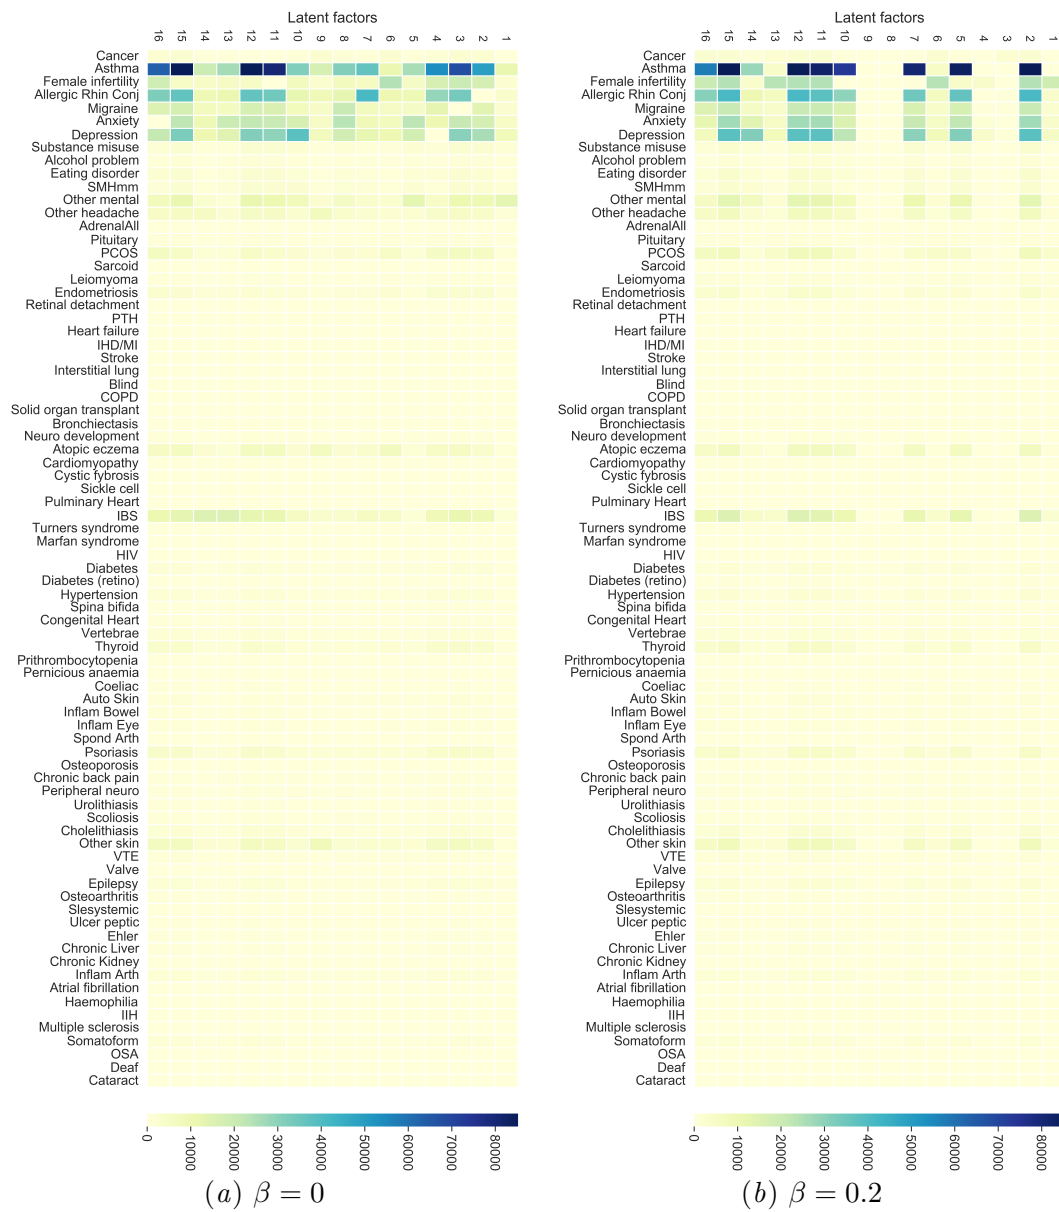

Figure 3: Factor prevalence on a cohort with (i) asthma, (ii) cancer, or (iii) female infertility health conditions.

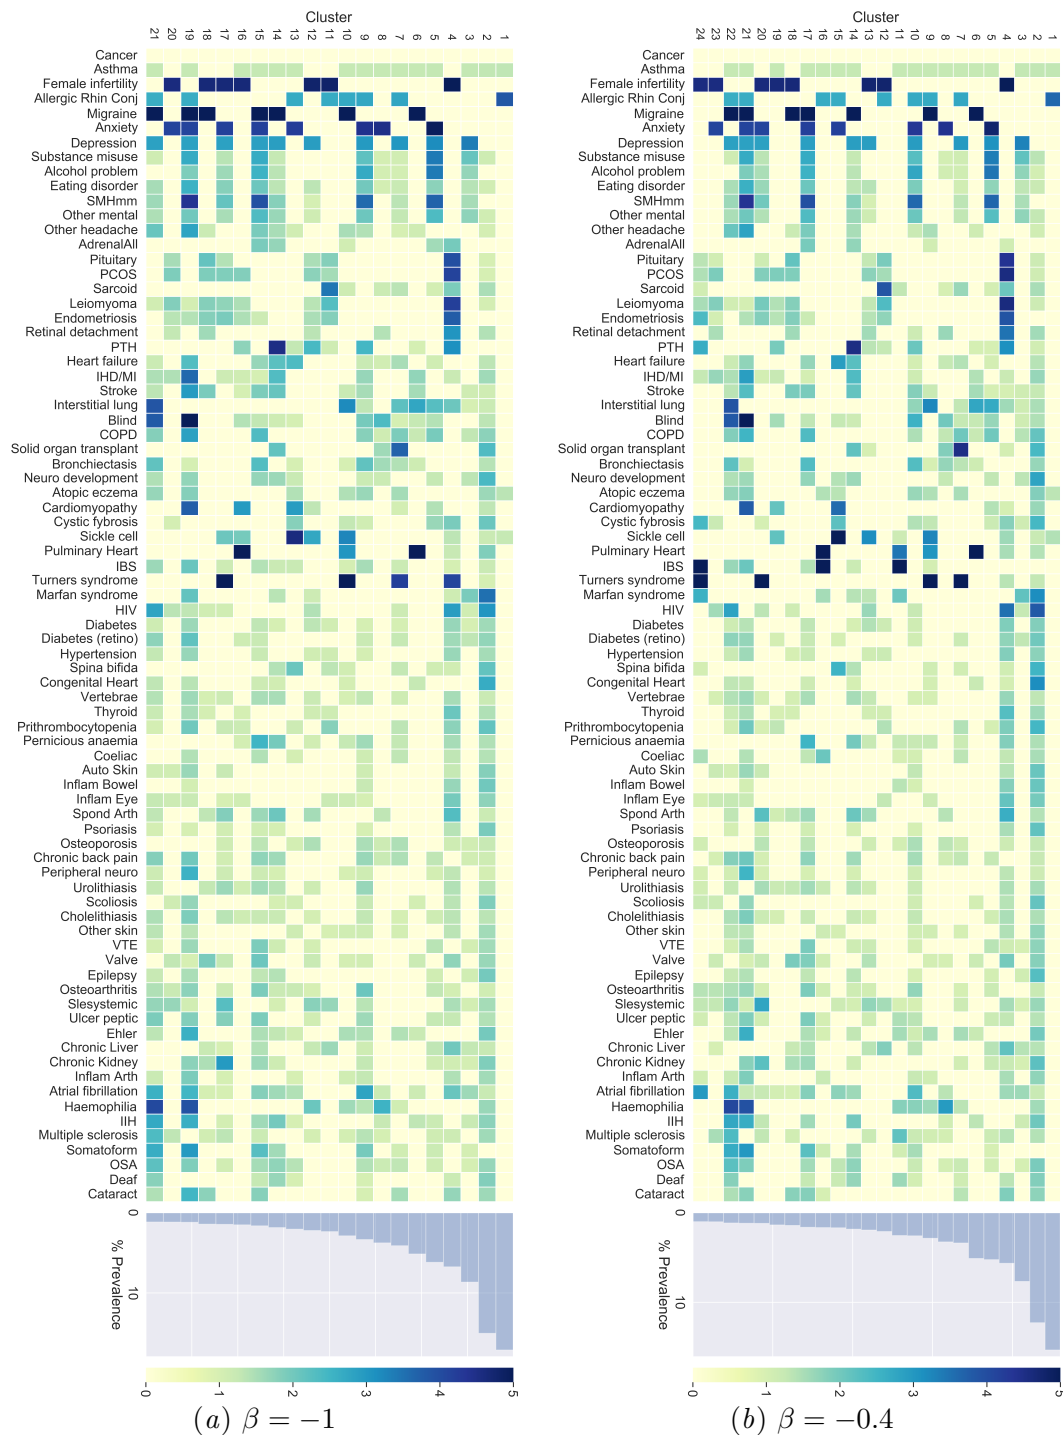

Figure 4: Clustering odds ratio on a cohort with (i) asthma, (ii) cancer, or (iii) female infertility health conditions, and the percentage of individuals in each cluster. Clusters with fewer than  $< 1\%$  of the samples are not shown and odds ratios are truncated.

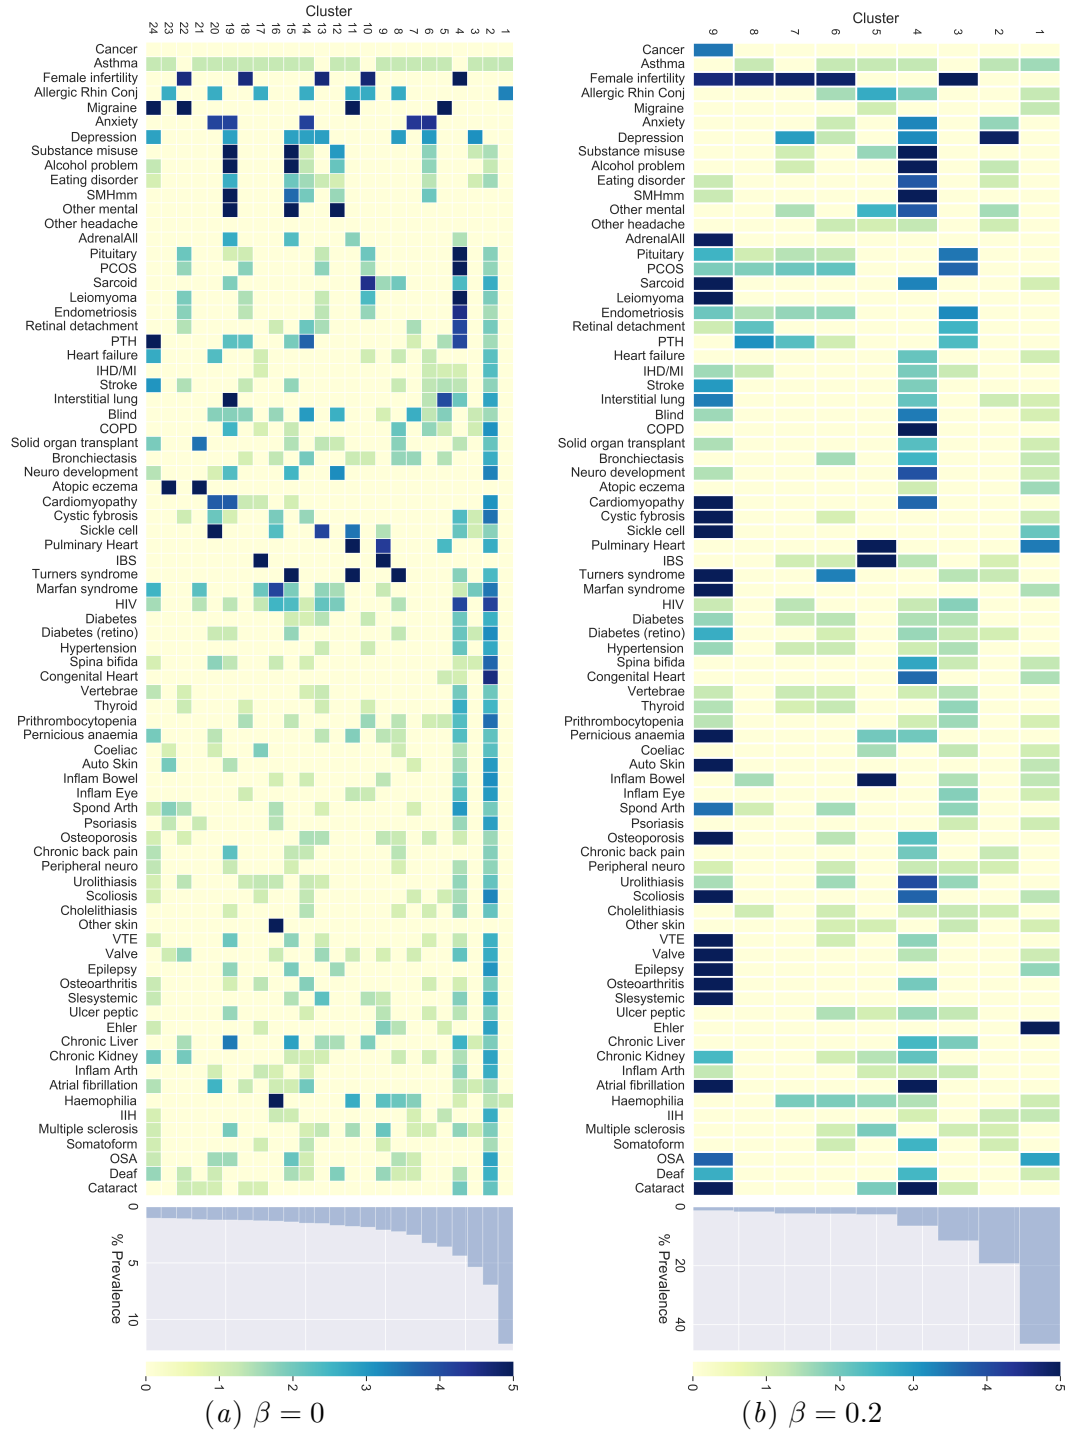

Figure 5: Clustering odds ratio on a cohort with (i) asthma, (ii) cancer, or (iii) female infertility health conditions, and the percentage of individuals in each cluster. Clusters with fewer than  $< 1\%$  of the samples are not shown and odds ratios are truncated.

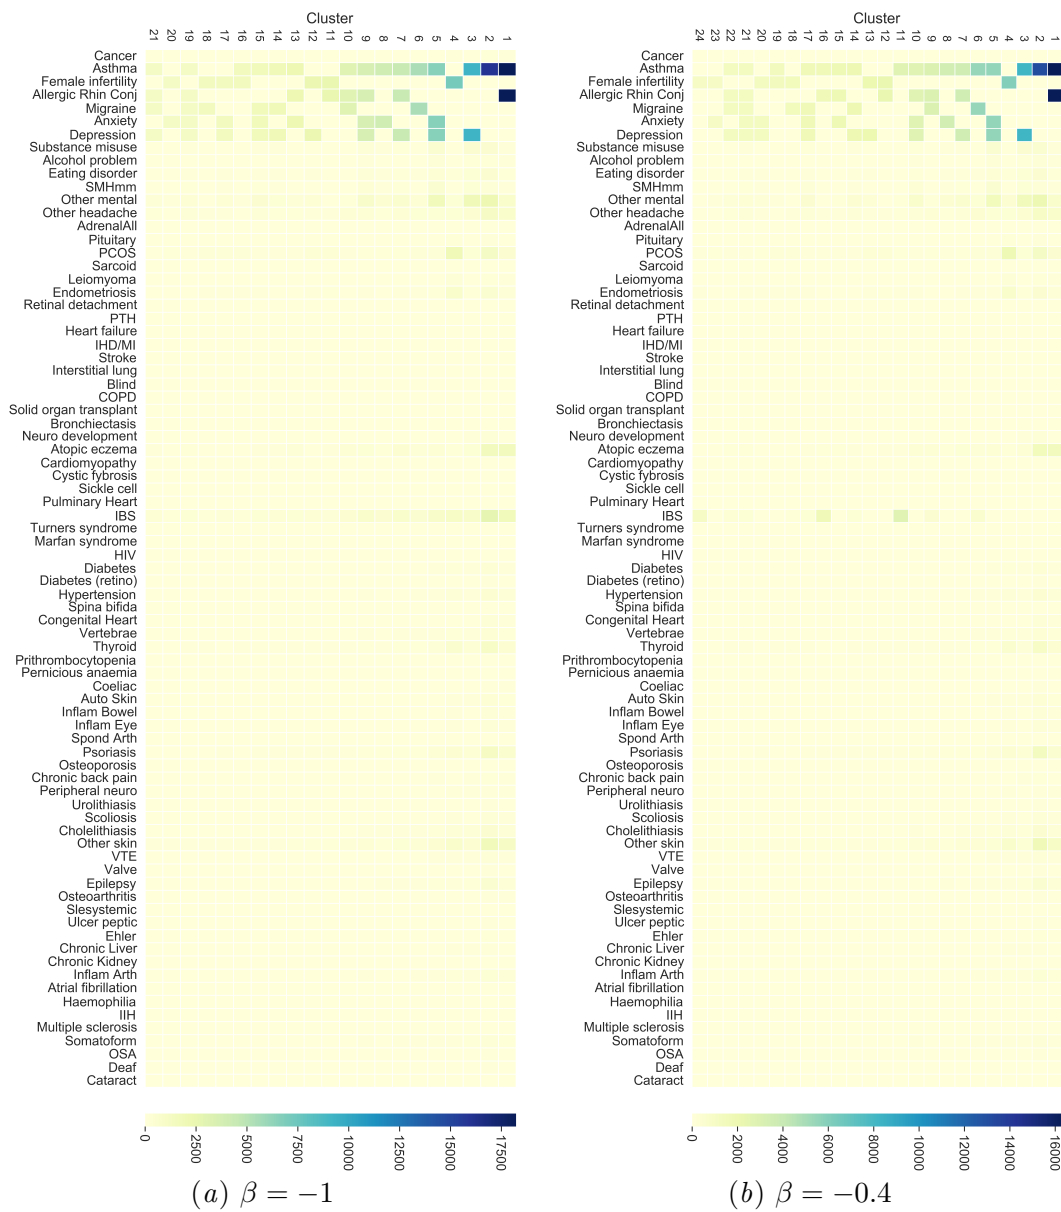

Figure 6: Cluster prevalence on a cohort with (i) asthma, (ii) cancer, or (iii) female infertility health conditions.



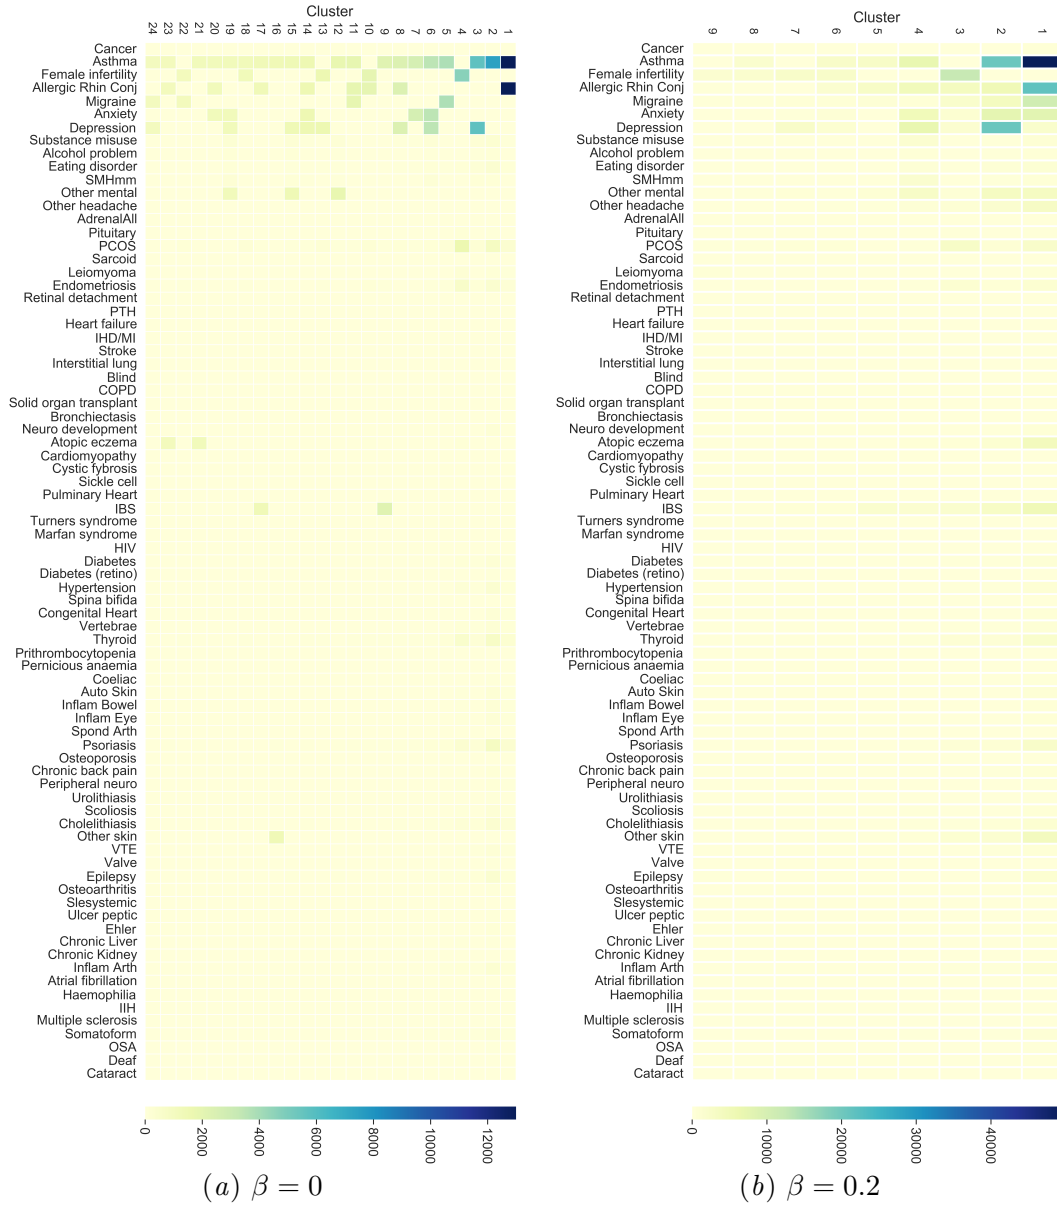

Figure 7: Cluster prevalence on a cohort with (i) asthma, (ii) cancer, or (iii) female infertility health conditions.

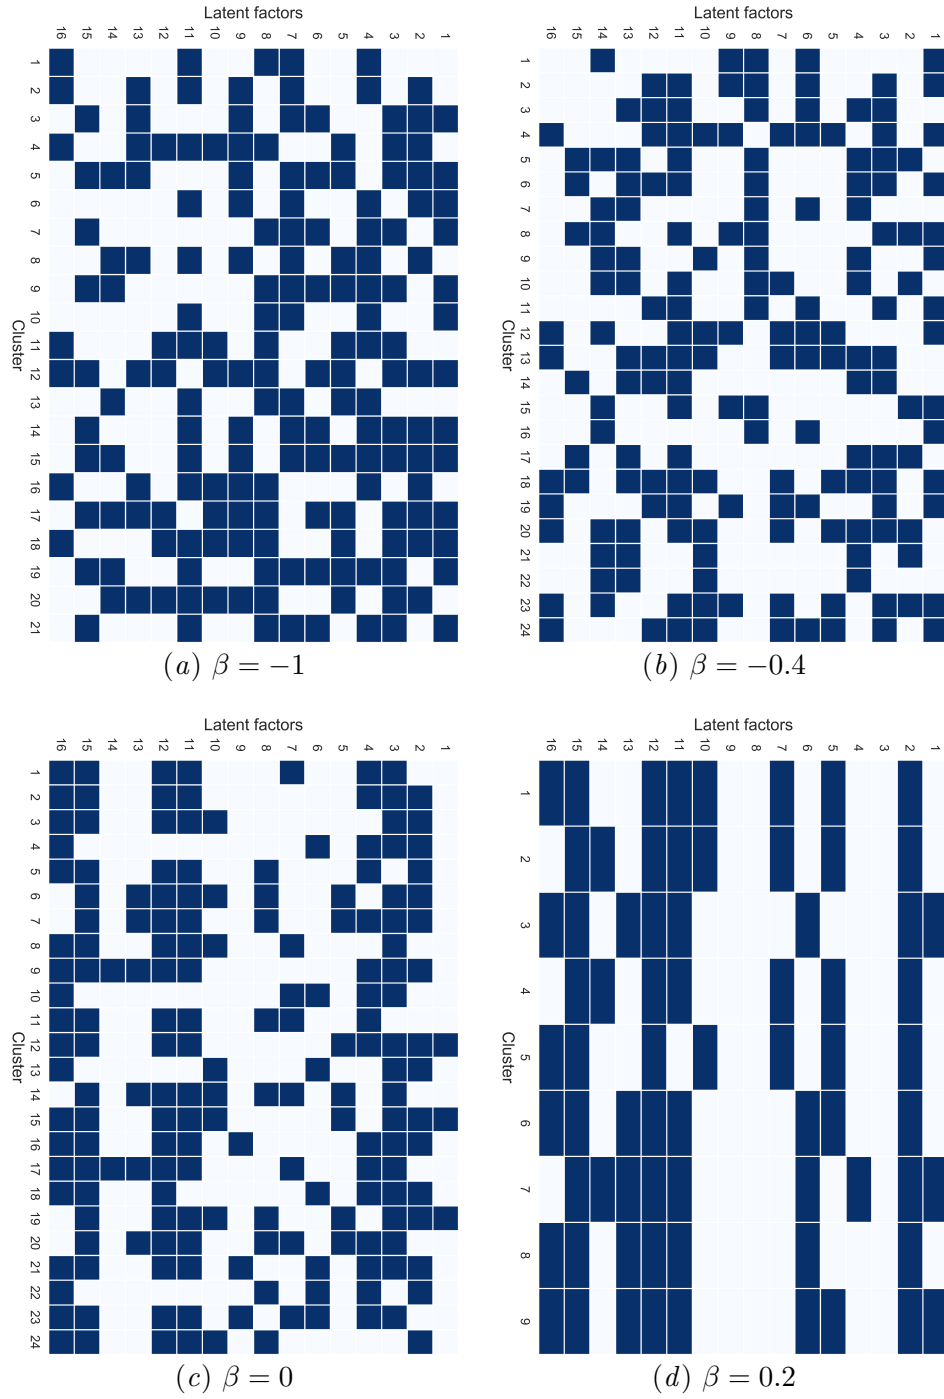

Figure 8: Cluster factor association matrices, indicating which factors are ‘turned on’ for each cluster.

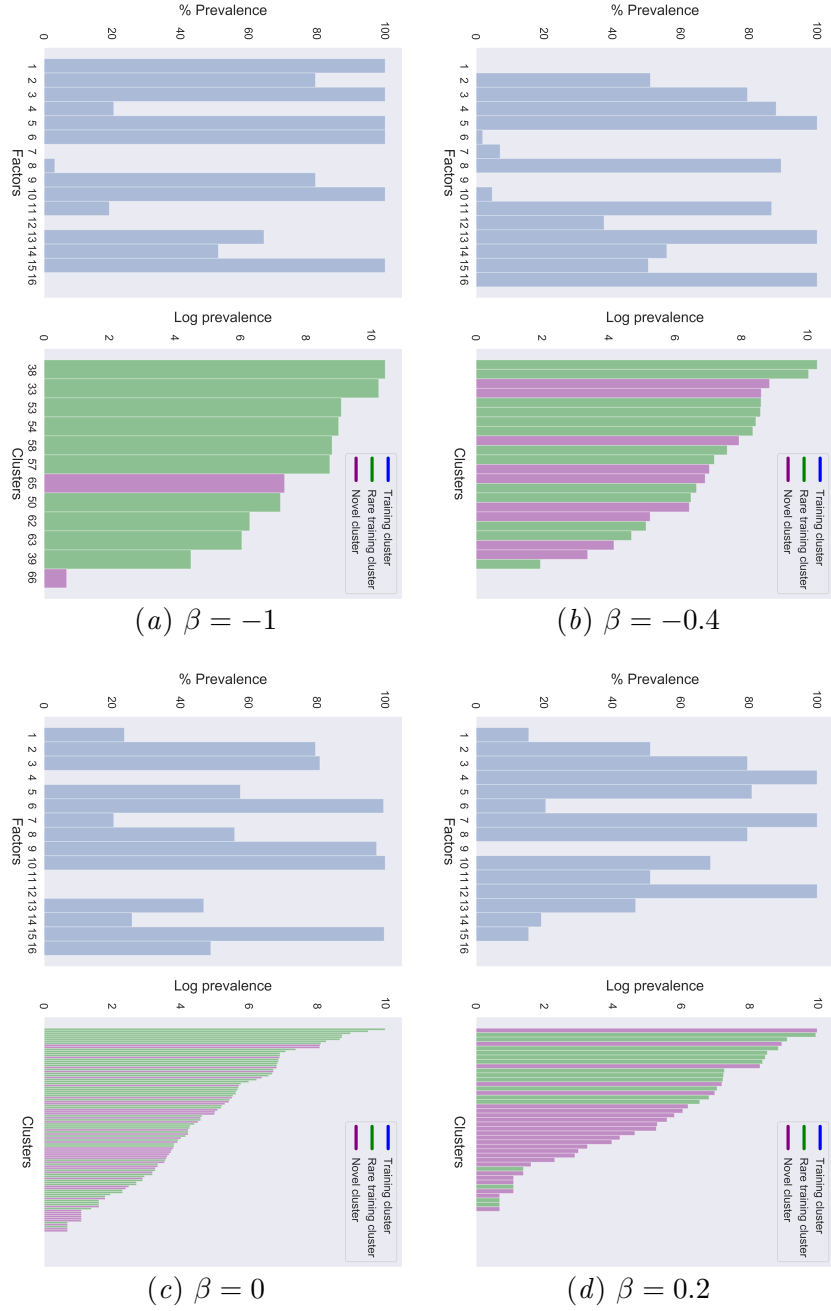

Figure 9: *Out-of-distribution* histogram plots. A test depression cohort is encoded using a mmVAE model trained on (i) asthma, (ii) cancer, or (iii) female infertility cases. No test combinations have been seen in training. Above (blue): The prevalence of test cases in each factor. Below (green/pink): The prevalence of test cases in clusters, labelled given their relation to the training clusters.
